# Supplementary material for: The Scope for Thalassemia Gene Therapy by Disruption of Aberrant Regulatory Elements
Source: PubMed Central journal article supplement (PMC6912506; doi:10.3390/jcm8111959), 2019-11-13
Supplement: jcm-08-01959-s001.pdf [file jcm-08-01959-s001.pdf]

## Contents

### 1. Supplementary Figures

Figure S1. Flow cytometry of electroporated MEL cell line.

Figure S2. Transfection and targeted disruption efficiencies in MEL *HBB<sup>IVS</sup>* bulk cells.

Figure S3. Characterization of TALEN- and RGN-induced indels in MEL-*HBB<sup>IVS</sup>* as bacterial clones.

Figure S4. Comparison of TALEN data in CD34+ and MEL cells

Figure S5. Schematic workflow of DARE target and nuclease compilation for new target loci.

### 2. Supplementary Tables

Table S1. Known  $\beta$ -thalassemia mutations passing the initial filter criteria for analysis.

### 3. References

1. Supplementary Figures

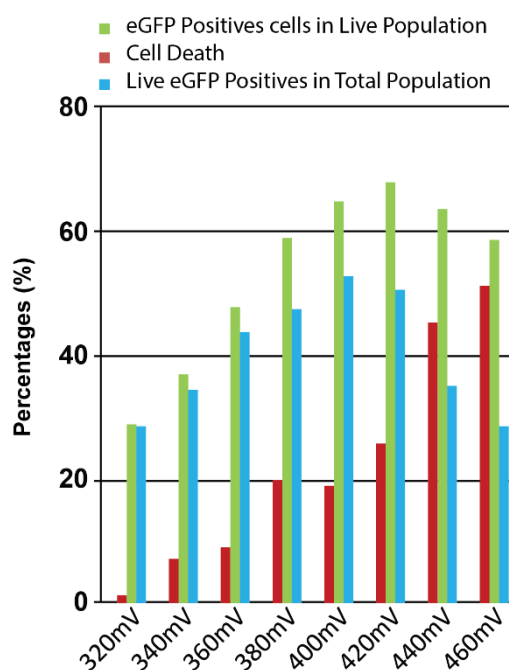

**Figure S1.** Flow cytometry of electroporated MEL cell line. Optimization of plasmid electroporation conditions in MEL cells. MEL cells were analyzed by flow cytometry 48 h after delivering the GFP reporter plasmid by electroporation, using a range of voltages and constant 1050  $\mu$ F capacitance. Cell death (% SYTOX Red positives) was background-corrected for that of the non-electroporated negative control ( $\approx$ 20%, not shown). Optimal electroporation conditions (highlighted in yellow) were those with the highest percentage of live GFP positives in the total population (400 mV and 1050  $\mu$ F).

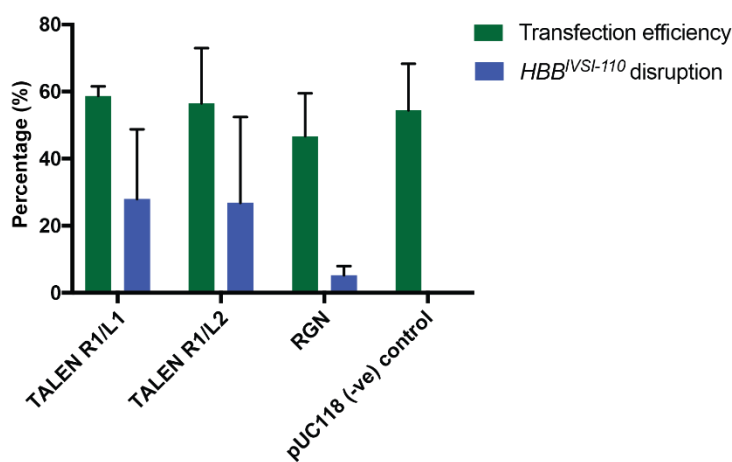

**Figure S2.** Transfection and targeted disruption efficiencies in MEL *HBB*<sup>IVS</sup> bulk cells. Transfection efficiency is shown as the average percentage of GFP positives measured by flow cytometry 48 h post-electroporation (green bars), and percentages of *HBB*<sup>IVS1-110(G>A)</sup>-targeted disruption on day 5 post-electroporation of (recovered) MEL *HBB*<sup>IVS</sup> bulk populations as measured by the T7E1 assay (blue bars). All displayed data comprised the average values of biological triplicates (n = 3;  $\pm$ SD).



to the normal splice acceptor site (+131 Normal SA). Intron 1 is shown unshaded, the intron-1 branchpoint site (IVSI BPS) in green, exon 2 in orange, the *HBB*<sup>IVSI-110(G>A)</sup> mutation in red, and the NHEJ-induced indels in pink. Aberrant (+110 (G>A) Aberrant SA) and normal (+131 Normal SA) splice acceptor sites are underlined (ag) sequences on the consensus sequence. Combined editing events of insertions (upper case) and deletions are shown. Binding sites of TALEN monomers are shown as blue arrows (A and B) and RGN gRNA and PAM sequence as purple and green lines (C) above each consensus sequence.

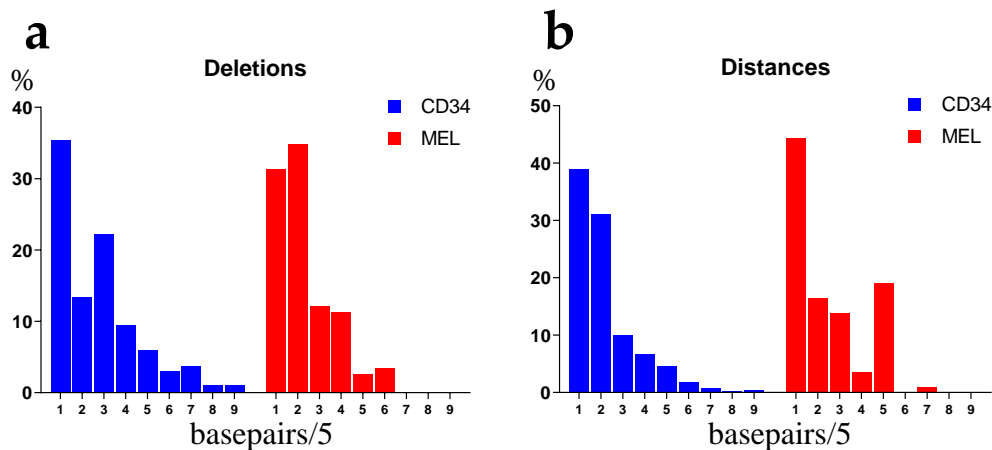

**Figure S4.** Comparison of TALEN data in CD34+ and MEL cells. Frequencies (a) of deletion sizes of the original *HBB*<sup>IVSI-110(G>A)</sup> on-target sequence and (b) the greatest distance of deletions from the predicted cleavage site are compared for *HBB*<sup>IVSI-110(G>A)</sup>-homozygous CD34+ cells [1] and MEL-HBBIVS cells (this study) after categorization in bin sizes of five base pairs. The Spearman constant for the correlation of the categorized data is 0.865 (*p* value of correlation: 0.007) for (a) and 0.848 (*p* value of correlation: 0.005) for (b). The Spearman constant for the underlying uncategorized data is 0.786 (*p* value of correlation:  $3.196 \times 10^{-12}$ ) for (a) and 0.745 (*P* value of correlation:  $1.580 \times 10^{-10}$ ) for (b).

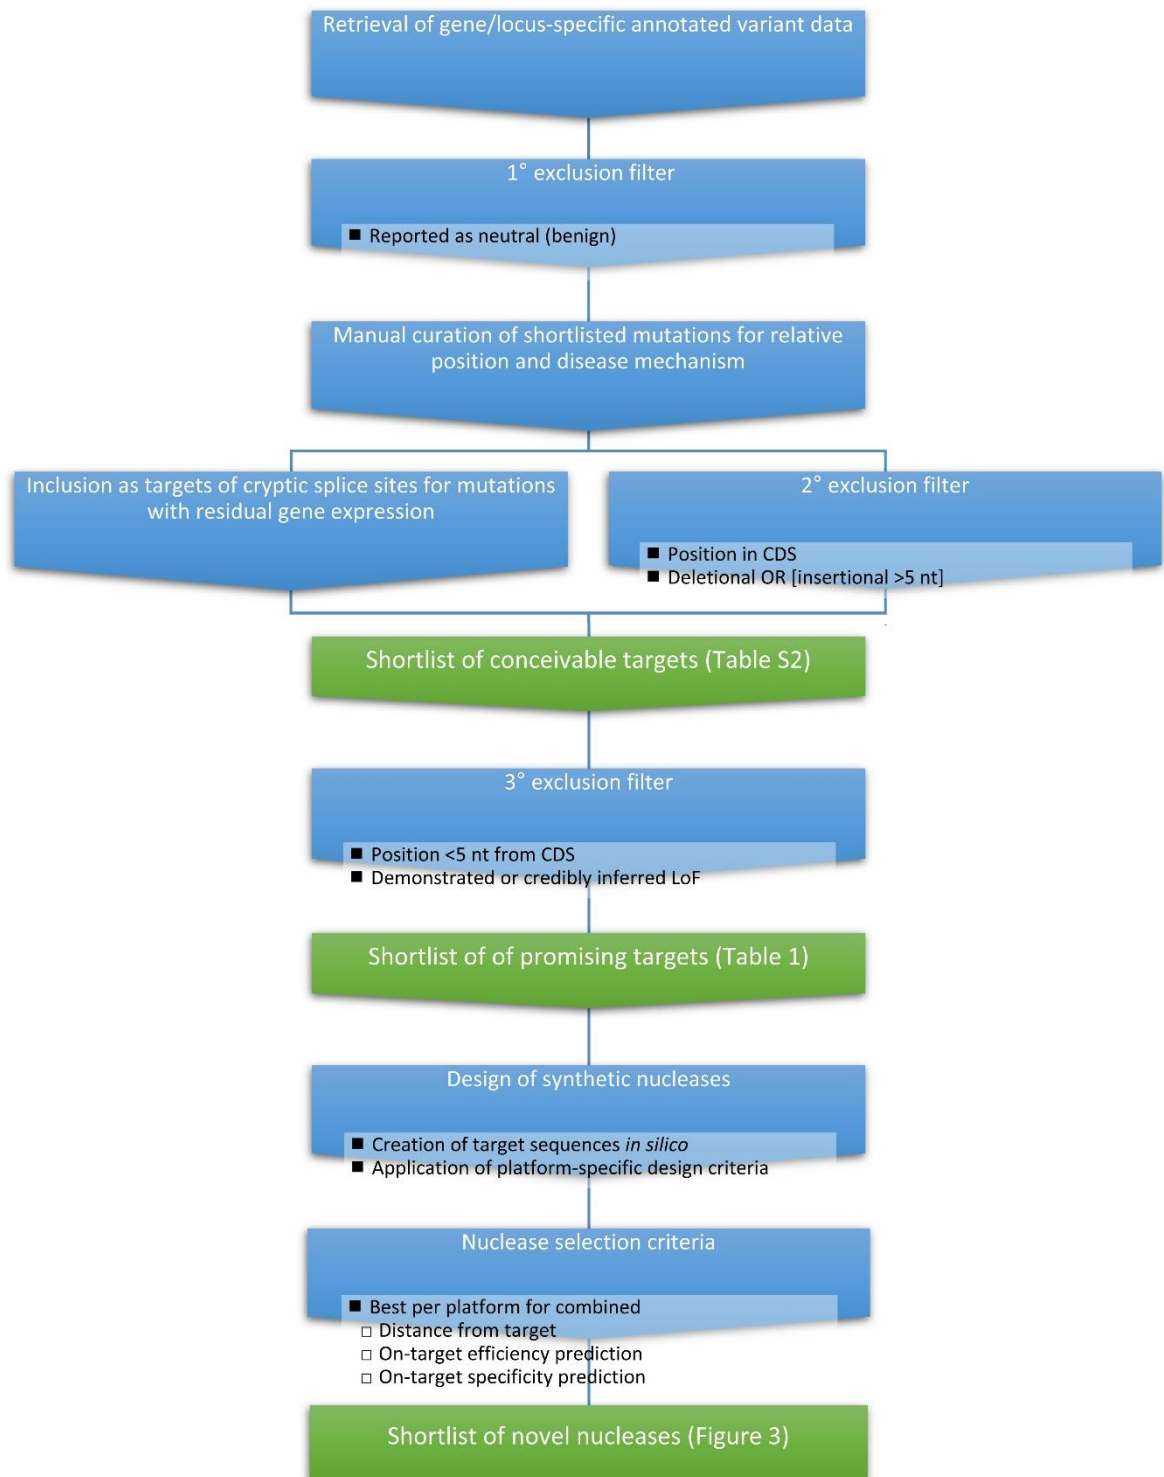

**Figure S5.** Schematic workflow of the DARE target and nuclease compilation for new target loci. 2° and 3° exclusion filters can be combined, where a list of conceivable targets is not of interest. CDS—coding sequence; LoF—loss of function; nt—nucleotide.

2. Supplementary Tables

**Table S1.** Known  $\beta$ -thalassemia mutations passing initial filter criteria for analysis.

| Ithald <sup>1</sup> | Common Name            | HGVS Name          | Type of mutation                                | Region                     | Exon <sup>→2</sup>  | References           |
|---------------------|------------------------|--------------------|-------------------------------------------------|----------------------------|---------------------|----------------------|
| 3081 <sup>3</sup>   | -223 T>C               | HBB:c.-273T>C      | Likely RE <sup>4</sup> LoF <sup>5</sup>         | Upstream promoter          | 273 nt <sup>6</sup> | [2]                  |
| 1                   | -190 G>A               | HBB:c.-240G>A      | Likely RE LoF                                   | Upstream promoter          | 240 nt              | [3]                  |
| 2                   | -102 C>A               | HBB:c.-152C>A      | RE LoF                                          | CACCC box, distal          | 152 nt              | [4]                  |
| 3                   | -101 C>T               | HBB:c.-151C>T      | RE LoF                                          | CACCC box, distal          | 151 nt              | [5]                  |
| 4                   | -101 C>G               | HBB:c.-151C>G      | RE LoF                                          | CACCC box, distal          | 151 nt              | [6]                  |
| 3059                | -98 T>A                | HBB:c.-148T>A      | Possible RE LoF                                 | near CACCC boxes           | 148 nt              | [7]                  |
| 5                   | -93 C>G                | HBB:c.-143C>G      | RE LoF                                          | near CACCC boxes           | 143 nt              | ITHANET <sup>7</sup> |
| 6                   | -92 C>T                | HBB:c.-142C>T      | RE LoF                                          | near CACCC boxes           | 142 nt              | [8]                  |
| 7                   | -90 C>T                | HBB:c.-140C>T      | RE LoF                                          | CACCC box, proximal        | 140 nt              | [7]                  |
| 3224                | -90 C>G                | HBB:c.-140C>G      | RE LoF                                          | CACCC box, proximal        | 140 nt              | [9]                  |
| 8                   | -88 C>T                | HBB:c.-138C>T      | RE LoF                                          | CACCC box, proximal        | 138 nt              | [7]                  |
| 9                   | -88 C>A                | HBB:c.-138C>A      | RE LoF                                          | CACCC box, proximal        | 138 nt              | [10]                 |
| 2178                | -88 C>G                | HBB:c.-138C>G      | RE LoF                                          | CACCC box, proximal        | 138 nt              | [11]                 |
| 10                  | -87 C>G                | HBB:c.-137C>G      | RE LoF                                          | CACCC box, proximal        | 137 nt              | [12]                 |
| 11                  | -87 C>T                | HBB:c.-137C>T      | RE LoF                                          | CACCC box, proximal        | 137 nt              | [13]                 |
| 12                  | -87 C>A                | HBB:c.-137C>A      | RE LoF                                          | CACCC box, proximal        | 137 nt              | [14]                 |
| 13                  | -86 C>G                | HBB:c.-136C>G      | RE LoF                                          | CACCC box, proximal        | 136 nt              | [15]                 |
| 14                  | -86 C>A                | HBB:c.-136C>A      | RE LoF                                          | CACCC box, proximal        | 136 nt              | [13]                 |
| 3077                | -83 G>A                | HBB:c.-133G>A      | Possible RE LoF                                 | near CACCC & CCAAT         | 133 nt              | [16]                 |
| 3069                | -77 G>C                | HBB:c.-127G>C      | Possible RE LoF                                 | near CACCC & CCAAT         | 127 nt              | [17]                 |
| 3386                | -76 C>A                | HBB:c.-126C>A      | RE LoF                                          | CCAAT box                  | 126 nt              | [18]                 |
| 15                  | -73 A>T                | HBB:c.-123A>T      | RE LoF                                          | CCAAT box                  | 123 nt              | [19]                 |
| 2997                | -72 T>A                | HBB:c.-122T>A      | RE LoF                                          | CCAAT box                  | 122 nt              | [20]                 |
| 2171                | -71 C>T                | HBB:c.-121C>T      | Likely RE LoF                                   | DRE <sup>8</sup>           | 121 nt              | [21]                 |
| 3043                | -71 C>T                | HBB:c.-121C>T      | Likely RE LoF                                   | DRE                        | 121 nt              | [11]                 |
| 16                  | -56 G>C                | HBB:c.-106G>C      | Likely RE LoF                                   | DRE                        | 106 nt              | [3]                  |
| 17                  | -50 G>A                | HBB:c.-100G>A      | Likely RE LoF                                   | DRE                        | 100 nt              | [22]                 |
| 3060                | -42 C>G                | HBB:c.-92C>G       | Likely RE LoF                                   | DRE                        | 92 nt               | [7]                  |
| 2172                | -41 A>T                | HBB:c.-91A>C       | Likely RE LoF                                   | DRE                        | 91 nt               | [23]                 |
| 18                  | -32 C>A                | HBB:c.-82C>A       | Likely RE LoF                                   | DRE                        | 82 nt               | [24]                 |
| 19                  | -32 C>T                | HBB:c.-82C>T       | Likely RE LoF                                   | DRE                        | 82 nt               | [25]                 |
| 20                  | -31 A>G                | HBB:c.-81A>G       | RE LoF                                          | TATA (ATAAAA) box          | 81 nt               | [26]                 |
| 21                  | -31 A>C                | HBB:c.-81A>C       | RE LoF                                          | TATA (ATAAAA) box          | 81 nt               | [27]                 |
| 22                  | -30 T>A                | HBB:c.-80T>A       | RE LoF                                          | TATA (ATAAAA) box          | 80 nt               | [28]                 |
| 23                  | -30 T>C                | HBB:c.-80T>C       | RE LoF                                          | TATA (ATAAAA) box          | 80 nt               | [29]                 |
| 2179                | -30 T>G                | HBB:c.-80T>G       | RE LoF                                          | TATA (ATAAAA) box          | 80 nt               | [11]                 |
| 25                  | -29 A>G                | HBB:c.-79A>G       | RE LoF                                          | TATA (ATAAAA) box          | 79 nt               | [30]                 |
| 26                  | -29 A>C                | HBB:c.-79A>C       | RE LoF                                          | TATA (ATAAAA) box          | 79 nt               | [31]                 |
| 28                  | -28 A>C                | HBB:c.-78A>C       | RE LoF                                          | TATA (ATAAAA) box          | 78 nt               | [32]                 |
| 29                  | -28 A>G                | HBB:c.-78A>G       | RE LoF                                          | TATA (ATAAAA) box          | 78 nt               | [33]                 |
| 30                  | -27 A>T                | HBB:c.-77A>T       | Likely RE LoF                                   | near TATA (ATAAAA)         | 77 nt               | [34]                 |
| 2175                | -26 A>C                | HBB:c.-76A>C       | Likely RE LoF                                   | near TATA (ATAAAA)         | 76 nt               | [23]                 |
| 32                  | -25 G>C                | HBB:c.-75G>C       | Likely RE LoF                                   | near TATA (ATAAAA)         | 75 nt               | [25]                 |
| 2565                | -25 G>T                | HBB:c.-75G>T       | Likely RE LoF                                   | near TATA (ATAAAA)         | 75 nt               | [35]                 |
| 34                  | CAP +1 A>C             | HBB:c.-50A>C       | LoF                                             | 5' UTR                     | 50 nt               | [36]                 |
| 3464                | CAP +3 A>T             | HBB:c.-48A>T       | LoF                                             | CAP initiator element      | 48 nt               | [37]                 |
| 35                  | CAP +8 C>T             | HBB:c.-43C>T       | Likely LoF                                      | 5' UTR                     | 43 nt               | [38]                 |
| 36                  | CAP +10 -T             | HBB:c.-41delT      | Mild LoF                                        | 5' UTR                     | 41 nt               | [39]                 |
| 2494                | CAP +16 A>G            | HBB:c.-35A>G       | Mild LoF                                        | 5' UTR                     | 35 nt               | [40]                 |
| 3345                | CAP +22 G>T            | HBB:c.-29G>T       | Mild LoF                                        | 5' UTR                     | 29 nt               | [41]                 |
| 38                  | CAP +22 G>A            | HBB:c.-29G>A       | Mild LoF                                        | 5' UTR                     | 29 nt               | [42]                 |
| 2536                | CAP +30 T>A            | HBB:c.-21T>A       | Mild LoF                                        | 5' UTR                     | 21 nt               | [43]                 |
| 39                  | CAP +33 C>G            | HBB:c.-18C>G       | Mild LoF                                        | 5' UTR                     | 18 nt               | [44]                 |
| 2176                | CAP +39 C>T            | HBB:c.-12C>T       | Mild LoF                                        | 5' UTR                     | 12 nt               | [45]                 |
| 40                  | CAP +40 to +43 (-AAAC) | HBB:c.-11_8delAAAC | LoF                                             | 5' UTR                     | 8 nt                | [46]                 |
| 41                  | CAP +45 (G>C)          | HBB:c.-6G>C        | Mild LoF                                        | 5' UTR, Kozak sequence     | 6 nt                | [47]                 |
| 107                 | IVS I-5 G>A            | HBB:c.92+5G>C      | Activation of cSD <sup>9</sup> ; partial SD LoF | SD <sup>10</sup> -proximal | 5 nt                | [12,48]              |

|         |                                |                                               |                                             |                         |        |                      |
|---------|--------------------------------|-----------------------------------------------|---------------------------------------------|-------------------------|--------|----------------------|
| 111     | IVS I-6 T>C                    | HBB:c.92+6T>C                                 | Activation of cSD; partial SD LoF           | SD-proximal             | 6 nt   | [49]                 |
| 112     | IVS I-7 A>T                    | HBB:c.92+7A>T                                 | Unknown                                     | SD-proximal             | 7 nt   | ITHANET <sup>7</sup> |
| 3276    | IVS I-7 A>G                    | HBB:c.92+7A>G                                 | Unknown                                     | SD-proximal             | 7 nt   | ITHANET <sup>7</sup> |
| 3445    | IVSI-13G                       | HBB:c.92+13                                   | Potential target                            | cSD activated by IthaID | 13 nt  | [12]                 |
| 113     | IVS I-110 G>A                  | HBB:c.93-21G>A                                | Confirmed target; GG>GA (aSA) <sup>11</sup> | aSA                     | 21 nt  | [1,50]               |
| 3008    | IVS I-115 A>T                  | HBB:c.93-16A>T                                | AT>TT (effect unclear)                      | Intronic                | 16 nt  | [51]                 |
| 114     | IVS I-116 T>G                  | HBB:c.93-15T>G                                | TT>GT (potential aSD) <sup>12</sup>         | Intronic                | 15 nt  | [52]                 |
| 115     | IVS I-128 T>G                  | HBB:c.93-3T>G                                 | SS LoF                                      | 3' pyrimidine run       | 3 nt   | [53]                 |
| 116     | IVS I-129 A>C                  | HBB:c.93-2A>C                                 | SS LoF                                      | SA <sup>13</sup>        | 2 nt   | [54]                 |
| 117     | IVS I-129 A>G                  | HBB:c.93-2A>G                                 | SS LoF                                      | SA                      | 2 nt   | [55]                 |
| 118     | IVS I-130 G>C                  | HBB:c.93-1G>C                                 | SS LoF                                      | SA                      | 1 nt   | [56]                 |
| 119/120 | IVS I-130 G>A                  | HBB:c.93-1G>A                                 | SS LoF                                      | SA                      | 1 nt   | [7,57–59]            |
| 200     | IVS II-1 G>A                   | HBB:c.315+1G>A                                | SS LoF                                      | SD                      | 1 nt   | [60,61]              |
| 201     | IVS II-1 G>C                   | HBB:c.315+1G>C                                | SS LoF                                      | SD                      | 1 nt   | [62]                 |
| 202     | IVS II-1 G>T                   | HBB:c.315+1G>T                                | SS LoF                                      | SD                      | 1 nt   | ITHANET <sup>7</sup> |
| 203     | IVS II-2 T>C                   | HBB:c.315+2T>C                                | SS LoF                                      | SD                      | 2 nt   | [63]                 |
| 204     | IVS II-2 T>A                   | HBB:c.315+2T>A                                | SS LoF                                      | SD                      | 2 nt   | ITHANET <sup>7</sup> |
| 3226    | IVS II-2 T>G                   | HBB:c.315+2T>G                                | SS LoF                                      | SD                      | 2 nt   | [9]                  |
| 208     | IVS II-5 G>C                   | HBB:c.315+5G>C                                | Activation of cSD; partial LoF              | Intronic                | 5 nt   | [64,65]              |
| 3446    | IVS II-579G                    | HBB:c.316-272                                 | cSA <sup>14</sup> activated by IthaID 214   | Intron                  | 270 nt | [12]                 |
| 210     | IVS II-613 C>T                 | HBB:c.316-238C>T                              | Activation of cryptic splice site           | Intron                  | 238 nt | [66]                 |
| 211     | IVS II-654 C>T                 | HBB:c.316-197C>T                              | Confirmed target; GC>GT (aSD)               | Intron                  | 197 nt | [50,67]              |
| 212     | IVS II-705 T>G                 | HBB:c.316-146T>G                              | Activation of cryptic splice site           | Intron                  | 146 nt | [68,69]              |
| 213     | IVS II-726 A>G                 | HBB:c.316-125A>G                              | Likely block of RNA processing              | Intron                  | 125 nt | [70]                 |
| 214     | IVS II-745 C>G                 | HBB:c.316-106C>G                              | aSD, activating cSA IthaID3446              | Intron                  | 106 nt | [12]                 |
| 215     | IVS II-761 A>G                 | HBB:c.316-90A>G                               | AT>GT (potential aSD)                       | Intron                  | 90 nt  | ITHANET <sup>7</sup> |
| 2183    | IVS II-781 C>G                 | HBB:c.316-70C>G                               | CT>GT (potential aSD)                       | Intron                  | 70 nt  | [11]                 |
| 216     | IVS II-815 C>T                 | HBB:c.316-36C>T                               | CT>GT (potential aSD)                       | Intron                  | 36 nt  | [71]                 |
| 217     | IVS II-837 T>G                 | HBB:c.316-14T>G                               | AT>AG (potential aSA)                       | Intron                  | 14 nt  | [72]                 |
| 218     | IVS II-843 T>G                 | HBB:c.316-8T>G                                | LoF                                         | 3' pyrimidine run       | 8 nt   | [73]                 |
| 219     | IVS II-844 C>A                 | HBB:c.316-7C>A                                | Presumed LoF, very mild                     | 3' pyrimidine run       | 7 nt   | [74]                 |
| 220     | IVS II-844 C>G                 | HBB:c.316-7C>G                                | Presumed LoF, very mild                     | 3' pyrimidine run       | 7 nt   | [75,76]              |
| 221     | IVS II-848 C>A                 | HBB:c.316-3C>A                                | LoF                                         | 3' pyrimidine run       | 3 nt   | [53,77]              |
| 222     | IVS II-848 C>G                 | HBB:c.316-3C>G                                | LoF                                         | 3' pyrimidine run       | 3 nt   | [78]                 |
| 3045    | IVS II-848 C>T                 | HBB:c.316-3C>T                                | Presumed LoF                                | 3' pyrimidine run       | 3 nt   | [11]                 |
| 267     | Terminal CD +6 C>G [CAP +1480] | HBB:c.*6C>G                                   | Mild LoF                                    | 3' UTR                  | 6 nt   | [79]                 |
| 2177    | Terminal CD +32                | HBB:*32A>C                                    | Presumed LoF                                | 3' UTR                  | 32 nt  | [45]                 |
| 268     | Terminal CD +47                | HBB:c.*47C>G                                  | Presumed LoF                                | 3' UTR                  | 47 nt  | ITHANET <sup>7</sup> |
| 3443    | Cap +1570 (T>C)                | HBB:c.*96T>C                                  | Presumed LoF, very mild                     | 3' UTR                  | 96 nt  | [80]                 |
| 278     | Poly A (-AATAA) AATAAA>-----   | HBB:c.*108_*112de 1AATAA                      | LoF                                         | poly(A) signal          | 108 nt | [81]                 |
| 270     | Poly A (A>C) AATAAA>CAT AAA    | HBB:c.*108A>C                                 | Mild LoF                                    | poly(A) signal          | 108 nt | [82]                 |
| 271     | Poly A (A>G) AATAAA>GAT        | HBB:c.*108A>G                                 | LoF                                         | poly(A) signal          | 108 nt | [83]                 |
| 277     | Poly A -AT                     | HBB:c.*109_*110de 1AT   HBB:c.*110_*111de 1TA | LoF                                         | poly(A) signal          | 109 nt | [84]                 |
| 272     | Poly A (T>C) AATAAA>AAC AAA    | HBB:c.*110T>C                                 | Mild LoF                                    | poly(A) signal          | 110 nt | [85]                 |
| 273     | Poly A (T>A) AATAAA>AAA AAA    | HBB:c.*110A>C                                 | Mild LoF                                    | poly(A) signal          | 110 nt | [86]                 |
| 3046    | Poly(A) AATAAA>AAT-1AA -A      | HBB:c.*111_*112de                             | Mild LoF                                    | poly(A) signal          | 111 nt | [87]                 |
| 274     | Poly A (A>G) AATAAA>AAT GAA    | HBB:c.*111A>G                                 | Mild LoF                                    | poly(A) signal          | 111 nt | [88]                 |

|      |                                    |               |                     |                          |         |      |
|------|------------------------------------|---------------|---------------------|--------------------------|---------|------|
| 2198 | Poly A (A>T)<br>AATAAAA>AAT<br>ATA | HBB:c.*112A>T | Mild LoF            | poly(A) signal           | 112 nt  | [89] |
| 275  | Poly A (A>G)<br>AATAAAA>AAT<br>AGA | HBB:c.*112A>G | Mild LoF            | poly(A) signal           | 112 nt  | [88] |
| 276  | Poly A (A>G)<br>AATAAAA>AAT<br>AAG | HBB:c.*113A>G | Mild LoF            | poly(A) signal           | 113 nt  | [90] |
| 2564 | 3'UTR +1592                        | HBB:c.*118A>G | Very mild or benign | Conserved +1592 nt in 3' | 1592 nt | [91] |
| 2463 | 3'UTR +101 G>C                     | HBB:c.*233G>C | Very mild or benign | 3' UTR-adjacent          | 101 nt  | [92] |

Fill color for “*Type of mutation*” indicates likely suitability for DARE, based on *Region*, severity and level of characterization. Absence of fill color — unsuitable for DARE; orange fill color — likely unsuitable for DARE; yellow fill color — possibly suitable for DARE; green fill color — likely or proven suitable for DARE and included in Table 1 of the manuscript.

<sup>1</sup> Nucleotide-specific target ID from ITHANET ([www.ithanet.eu](http://www.ithanet.eu)); <sup>2</sup> Distance of the target from the nearest exon;

<sup>3</sup> IthaID3083 was the only *HBB* mutation detected in heterozygosity in a  $\beta$ -thalassemic patient. The second mutation is presumed to have escaped detection. IthaID3083 would be a potential target if it turned out to be dominant after all; <sup>4</sup> RE — response element; <sup>5</sup> LoF — loss of function; <sup>6</sup> nt — nucleotide; <sup>7</sup> Unpublished data retrieved from the ITHANET Portal [93]; <sup>8</sup> DRE — direct repeat element; <sup>9</sup> cSD — cryptic splice donor; <sup>10</sup> SD — splice donor; <sup>11</sup> aSA — aberrant splice acceptor; <sup>12</sup> aSD — aberrant splice donor; <sup>13</sup> SA — splice acceptor; <sup>14</sup> cSA — cryptic splice acceptor



## References

1. Patsali, P.; Turchiano, G.; Papisavva, P.; Romito, M.; Loucari, C.C.; Stephanou, C.; Christou, S.; Sitarou, M.; Mussolino, C.; Cornu, T.I.; et al. Correction of IVS I-110(G>A)  $\beta$ -thalassemia by CRISPR/Cas- and TALEN-mediated disruption of aberrant regulatory elements in human hematopoietic stem and progenitor cells. *Haematologica* **2019**, Epub.
2. Nagar, R.; Sinha, S.; Raman, R. Genotype-phenotype correlation and report of novel mutations in  $\beta$ -globin gene in thalassemia patients. *Blood Cells. Mol. Dis.* **2015**, *55*, 10–4.
3. Agouti, I.; Bennani, M.; Nezri, M.; Levy, N.; Badens, C. Beta-thalassemia intermedia due to two novel mutations in the promoter region of the beta-globin gene. *Eur J Haematol* **2008**, *80*, 346–350.
4. Aguilar-Martinez, P.; Jourdan, E.; Brun, S.; Cunat, S.; Giansily-Blaizot, M.; Pissard, S.; Schved, J.-F. A novel mutation of the beta-globin gene promoter (-102 C>A) and pitfalls in family screening. *Am. J. Hematol.* **2007**, *82*, 1088–90.
5. Maragoudaki, E.; Kanavakis, E.; Traeger-Synodinos, J.; Vrettou, C.; Tzetis, M.; Metaxotou-Mavrommati, A.; Kattamis, C. Molecular, haematological and clinical studies of the -101 C --> T substitution of the beta-globin gene promoter in 25 beta-thalassaemia intermedia patients and 45 heterozygotes. *Br J Haematol* **1999**, *107*, 699–706.
6. Moi, P.; Faa, V.; Marini, M.G.; Asunis, I.; Ibba, G.; Cao, A.; Rosatelli, M.C. A novel silent beta-thalassemia mutation in the distal CACCC box affects the binding and responsiveness to EKLF. *Br. J. Haematol.* **2004**, *126*, 881–884.
7. Yasmeen, H.; Toma, S.; Killeen, N.; Hasnain, S.; Foroni, L. The molecular characterization of Beta globin gene in thalassemia patients reveals rare and a novel mutations in Pakistani population. *Eur. J. Med. Genet.* **2016**, *59*, 355–62.
8. Rosatelli, M.C.; Faà, V.; Meloni, A.; Fiorenza, F.; Galanello, R.; Gasperini, D.; Amendola, G.; Cao, A. A promoter mutation, C-&gt;T at position -92, leading to silent beta-thalassaemia. *Br. J. Haematol.* **1995**, *90*, 483–5.
9. Rizo-de-la-Torre, L.C.; Ibarra, B.; Sánchez-López, J.Y.; Magaña-Torres, M.T.; Rentería-López, V.M.; Perea-Díaz, F.J. Three novel HBB mutations, c.-140C&gt;G (-90 C&gt;G), c.237\_256delGGACAACCTCAAGGGCACCT (FS Cd 78/85 -20 bp), and c.315+2T&gt;G (IVS2:2 T&gt;G). Update of the mutational spectrum of  $\beta$ -Thalassemia in Mexican mestizo patients. *Int. J. Lab. Hematol.* **2017**, *39*, 539–545.
10. Rund, D.; Cohen, T.; Filon, D.; Dowling, C.E.; Warren, T.C.; Barak, I.; Rachmilewitz, E.; Kazazian, H.H.; Oppenheim, A. Evolution of a genetic disease in an ethnic isolate: beta-thalassemia in the Jews of Kurdistan. *Proc. Natl. Acad. Sci. U. S. A.* **1991**, *88*, 310–4.
11. Henderson, S.J.; Timbs, A.T.; McCarthy, J.; Gallienne, A.E.; Proven, M.; Rugless, M.J.; Lopez, H.; Eglinton, J.; Dziedzic, D.; Beardsall, M.; et al. Ten Years of Routine  $\alpha$ - and  $\beta$ -Globin Gene Sequencing in UK Hemoglobinopathy Referrals Reveals 60 Novel Mutations. *Hemoglobin* **2016**, *40*, 75–84.
12. Treisman, R.; Orkin, S.H.; Maniatis, T. Specific transcription and RNA splicing defects in five cloned beta-thalassaemia genes. *Nature* **1983**, *302*, 591–596.
13. Meloni, A.; Rosatelli, M.C.; Faà, V.; Sardu, R.; Saba, L.; Murru, S.; Sciarratta, G. V.; Baldi, M.; Tannoia, N.; Vitucci, A.; et al. Promoter mutations producing mild  $\beta$ -thalassaemia in the Italian population. *Br. J. Haematol.* **1992**, *80*, 222–226.
14. Coleman, M.B.; Steinberg, M.H.; Harrell, A.H.; Plonczynski, M.W.; Walker, A.M.; Adams, J.G. The -87 (C→A)  $\beta^+$ -Thalassemia Mutation in a Black Family. *Hemoglobin* **1992**, *16*, 399–401.
15. Thein, S.L.; Winichagoon, P.; Hesketh, C.; Best, S.; Fucharoen, S.; Wasi, P.; Weatherall, D.J. The molecular basis of beta-thalassemia in Thailand: application to prenatal diagnosis. *Am. J. Hum. Genet.* **1990**, *47*, 369–75.
16. Cadet, E.; Foulon, K.; Claisse, J.-F.; Rochette, J. First identification of a point mutation at position -83 (G>A) of the beta-globin gene promoter. *Hemoglobin* **2009**, *33*, 274–8.
17. Bilgen, T.; Canatan, D.; Delibas, S.; Keser, I. A Novel Mutation in the Promoter Region of the  $\beta$ -Globin Gene: HBB: c.-127G > C. *Hemoglobin* **2016**, *40*, 280–2.
18. Refaldi, C.; Mocellin, M.C.; Cappellini, M.D. Gene symbol: HBB. *Hum. Genet.* **2007**, *121*, 298.
19. Chen, X.-W.; Mo, Q.-H.; Li, Q.; Zeng, R.; Xu, X.-M. A novel mutation of -73(A→T) in the CCAAT box of the  $\beta$ -globin gene identified in a patient with the mild  $\beta$ -thalassemia intermedia. *Ann. Hematol.* **2007**, *86*, 653–657.

20. Ma, Q.; Abel, K.; Sripichai, O.; Whitacre, J.; Angkachatchai, V.; Makarasara, W.; Winichagoon, P.; Fucharoen, S.; Braun, A.; Farrer, L.A. Beta-globin gene cluster polymorphisms are strongly associated with severity of HbE/beta(0)-thalassemia. *Clin Genet* **2007**, *72*, 497–505.
21. Al Zadjali, S.; Wali, Y.; Al Lawatiya, F.; Gravell, D.; Alkindi, S.; Al Falahi, K.; Krishnamoorthy, R.; Daar, S. The  $\beta$ -globin promoter -71 C>T mutation is a  $\beta^+$  thalassaemic allele. *Eur. J. Haematol.* **2011**, *87*, 457–60.
22. Li, D.-Z.; Liao, C.; Xie, X.-M.; Zhou, J.-Y. A novel mutation of -50 (G-->A) in the direct repeat element of the beta-globin gene identified in a patient with severe beta-thalassaemia. *Ann. Hematol.* **2009**, *88*, 1149–50.
23. Salehi, R.; Fisher, C.A.; Bignell, P.A.; Eslami, G.; Old, J.M. Identification of three novel mutations [-41 (A<math>\&gt;CHemoglobin **2010**, *34*, 115–20.
24. Lin, C.-K.; Lin, J.-S.; Jiang, M.-L. Letter to the editor: Iron absorption is increased in hemoglobin H diseases. *Am. J. Hematol.* **1992**, *40*, 74–75.
25. Eng, B.; Walker, L.; Nakamura, L.M.; Hoppe, C.; Azimi, M.; Lee, H.; Waye, J.S. Three new beta-globin gene promoter mutations identified through newborn screening. *Hemoglobin* **2007**, *31*, 129–34.
26. Takihara, Y.; Nakamura, T.; Yamada, H.; Takagi, Y.; Fukumaki, Y. A novel mutation in the TATA box in a Japanese patient with beta + -thalassaemia. *Blood* **1986**, *67*, 547–50.
27. Huisman, T.H.J. Compound Heterozygosity for Hb S and the Hybrid Hbs Lepore, P-Nilotic, and Kenya; Comparison of Hematological and Hemoglobin Composition Data. *Hemoglobin* **1997**, *21*, 249–257.
28. Fei, Y.J.; Stoming, T.A.; Efremov, G.D.; Efremov, D.G.; Battacharia, R.; Gonzalez-Redondo, J.M.; Altay, C.; Gurgey, A.; Huisman, T.H. Beta-thalassaemia due to a T---A mutation within the ATA box. *Biochem. Biophys. Res. Commun.* **1988**, *153*, 741–7.
29. Cai, S.P.; Zhang, J.Z.; Doherty, M.; Kan, Y.W. A new TATA box mutation detected at prenatal diagnosis for  $\beta$ -thalassaemia. *Am. J. Hum. Genet.* **1989**, *45*, 112–114.
30. Antonarakis, S.E.; Irkin, S.H.; Cheng, T.C.; Scott, A.F.; Sexton, J.P.; Trusko, S.P.; Charache, S.; Kazazian, H.H. beta-Thalassaemia in American Blacks: novel mutations in the &quot;TATA&quot; box and an acceptor splice site. *Proc. Natl. Acad. Sci.* **1984**, *81*, 1154–1158.
31. Sadiq, M.F.; Eigel, A.; Horst, J. Spectrum of  $\beta$ -thalassaemia in Jordan: Identification of two novel mutations. *Am. J. Hematol.* **2001**, *68*, 16–22.
32. Poncz, M.; Ballantine, M.; Solowiejczyk, D.; Barak, I.; Schwartz, E.; Surrey, S. beta-Thalassaemia in a Kurdish Jew. Single base changes in the T-A-T-A box. *J. Biol. Chem.* **1982**, *257*, 5994–6.
33. Orkin, S.H.; Sexton, J.P.; Cheng, T.; Goff, S.C.; Giardina, P.J. V.; Joseph, I.L.; Hazazian, H.H. ATA box transcription mutation in  $\beta$  -thalassaemia. *Nucleic Acids Res.* **1983**, *11*, 4727–4734.
34. al., B. et Characterization of a New Polymorphism, IVS-I-108 (T->C), and a New  $\beta$ -Thalassaemia Mutation, -27 (A->T), Discovered in the Course of a Prenatal Diagnosis. *Hemoglobin* **1999**, *23*, 339–344.
35. Li, Z.; Li, L.; Yao, Y.; Li, N.; Li, Y.; Zhang, Z.; Yan, F.; Qiu, H.; Wu, C.; Zhang, Z. A novel promoter mutation (HBB: c.-75G<math>\&gt;T\beta(+)-thalassaemia. *Hemoglobin* **2015**, *39*, 115–20.
36. Wong, C.; Dowling, C.E.; Saiki, R.K.; Higuchi, R.G.; Erlich, H.A.; Kazazian, H.H. Characterization of  $\beta$ -thalassaemia mutations using direct genomic sequencing of amplified single copy DNA. *Nature* **1987**, *330*, 384–386.
37. Letitia, D.; Rodica, T.; Xenia, F.; Daniel, C.; Florentina, V.; Marina, K.; Ciprian, T.; Lucian, G. A novel  $\beta$ -globin gene CAP site mutation in association with the 92+1G>A mutation was found in a thalassaemia intermedia patient. *Rom. Biotechnol. Lett.* **2011**, *16*, 6042–6047.
38. Ma, S.K.; Ha, S.Y.; Chan, A.Y.Y.; Chan, G.C.F.; Lau, Y.L.; Chan, L.C. Two Novel  $\beta$ -Thalassaemia Alleles in the Chinese: the IVS-II-2 (-T) and Nucleotide +8 (C->T)  $\beta$ -Globin Gene Mutations. *Hemoglobin* **2000**, *24*, 327–332.
39. Athanassiadou, A.; Papachatzopoulou, A.; Zoumbos, N.; Maniatis, G.M.; Gibbs, R. A novel beta-thalassaemia mutation in the 5' untranslated region of the beta-globin gene. *Br. J. Haematol.* **1994**, *88*, 307–10.
40. Vinciguerra, M.; Passarello, C.; Leto, F.; Cassarà, F.; Cannata, M.; Maggio, A.; Giambona, A. Identification of three new nucleotide substitutions in the  $\beta$ -globin gene: laboratoristic approach and impact on genetic counselling for beta-thalassaemia. *Eur. J. Haematol.* **2014**, *92*, 444–9.
41. Vinciguerra, M.; Passarello, C.; Cassarà, F.; Leto, F.; Cannata, M.; Calvaruso, G.; Renda, D.; Maggio, A.; Giambona, A. Coheredity of a new silent mutation: c.-29G>T, with a severe  $\beta$ -thal mutation in a patient with  $\beta$ -thalassaemia intermedia. *Int. J. Lab. Hematol.* **2018**, *40*, e17–e20.
42. Oner, R.; Agarwal, S.; Dimovski, A.J.; Efremov, G.D.; Petkov, G.H.; Altay, C.; Gurgey, A.; Huisman, T.H.

- The G---A mutation at position +22 3' to the Cap site of the beta-globin gene as a possible cause for a beta-thalassemia. *Hemoglobin* **1991**, *15*, 67–76.
43. Aldemir, O.; Izmirli, M.; Kaya, H. The spectrum of  $\beta$ -thalassemia mutations in Hatay, Turkey: Reporting three new mutations. *Hemoglobin* **2014**, *38*, 325–328.
  44. Ho, P.J.; Rochette, J.; Fisher, C.A.; Wonke, B.; Jarvis, M.K.; Yardumian, A.; Thein, S.L. Moderate reduction of beta-globin gene transcript by a novel mutation in the 5' untranslated region: a study of its interaction with other genotypes in two families. *Blood* **1996**, *87*, 1170–8.
  45. Chen, W.; Zhang, X.; Shang, X.; Cai, R.; Li, L.; Zhou, T.; Sun, M.; Xiong, F.; Xu, X. The molecular basis of beta-thalassemia intermedia in southern China: Genotypic heterogeneity and phenotypic diversity. *BMC Med. Genet.* **2010**, *11*.
  46. Huang, S.Z.; Xu, Y.H.; Zeng, F.Y.; Wu, D.F.; Ren, Z.R.; Zeng, Y.T. A novel beta-thalassaemia mutation: deletion of 4 bp (-AAAC) in the 5' transcriptional sequence. *Br. J. Haematol.* **1991**, *78*, 125–6.
  47. De Angioletti, M.; Lacerra, G.; Sabato, V.; Carestia, C.  $\beta+45\text{ G} \rightarrow \text{C}$ : A novel silent  $\beta$ -thalassaemia mutation, the first in the Kozak sequence. *Br. J. Haematol.* **2004**, *124*, 224–231.
  48. Kazazian, H.H.; Orkin, S.H.; Antonarakis, S.E.; Sexton, J.P.; Boehm, C.D.; Goff, S.C.; Waber, P.G. Molecular characterization of seven beta-thalassemia mutations in Asian Indians. *EMBO J.* **1984**, *3*, 593–596.
  49. Tamagnini, G.P.; Lopes, M.C.; Castanheira, M.E.; Wainscoat, J.S.; Wood, W.G.  $\beta$  + Thalassaemia-Portuguese type: clinical, haematological and molecular studies of a newly defined form of  $\beta$  thalassaemia. *Br. J. Haematol.* **2008**, *54*, 189–200.
  50. Xu, S.; Luk, K.; Yao, Q.; Shen, A.H.; Zeng, J.; Wu, Y.; Luo, H.-Y.; Brendel, C.; Pinello, L.; Chui, D.H.K.; et al. Editing aberrant splice sites efficiently restores  $\beta$ -globin expression in  $\beta$ -thalassemia. *Blood* **2019**, blood-2019-01-895094.
  51. Sahoo, S.S.; Biswal, S.; Dixit, M. Distinctive mutation spectrum of the HBB gene in an urban eastern Indian population. *Hemoglobin* **2014**, *38*, 33–38.
  52. Metherall, J.E.; Collins, F.S.; Pan, J.; Weissman, S.M.; Forget, B.G.; J.E., M.; Collins F.S.; Pan J.; Weissman S.M.; B.G., F.; et al. Beta zero Thalassemia caused by a base substitution that creates an alternative splice acceptor site in an intron. *EMBO J.* **1986**, *5*, 2551–2557.
  53. Wong, C.; Antonarakis, S.E.; Goff, S.C.; Orkin, S.H.; Forget, B.G.; Nathan, D.G.; Giardina, P.J.; Kazazian, H.H. Beta-thalassemia due to two novel nucleotide substitutions in consensus acceptor splice sequences of the beta-globin gene. *Blood* **1989**, *73*, 914–8.
  54. Old, J.M.; Khan, S.N.; Verma, I.C.; Fucharoen, S.; Kleanthous, M.; Ioannou, P.; Kotea, N.; Fisher, C.A.; Riazuddin, S.; Saxena, R.; et al. A multi-center study in order to further define the molecular basis of beta-thalassemia in Thailand, Pakistan, Sri Lanka, Mauritius, Syria, and India, and to develop a simple molecular diagnostic strategy by amplification refractory mutation system-polyme. *Hemoglobin* **2001**, *25*, 397–407.
  55. Vetter, B.; Schwarz, C.; Kohne, E.; Kulozik, A.E. Beta-thalassaemia in the immigrant and non-immigrant German populations. *Br. J. Haematol.* **1997**, *97*, 266–72.
  56. Yamamoto, K.; Yamamoto, K.; Hattori, Y.; Yamashiro, Y.; Hoshitani, M.; Morishita, M.; Ohba, Y.; Katahira, H.; Karasawa, M.; Omine, M. Two beta-thalassemia mutations in Japan: codon 121 (GAA----TAA) and IVS-I-130 (G----C). *Hemoglobin* **1992**, *16*, 295–302.
  57. al., D. et A New  $\beta$ -Thalassemia Mutation Produced by a Single Nucleotide Substitution in the Conserved Dinucleotide Sequence of the IVS-I Consensus Acceptor Site (Ag $\rightarrow$ AA). *Hemoglobin* **1990**, *14*, 431–440.
  58. Oner, R.; Altay, C.; Gurgey, A.; Aksoy, M.; Kiliç, Y.; Stoming, T.A.; Reese, A.L.; Kutlar, A.; Kutlar, F.; Huisman, T.H. Beta-thalassemia in Turkey. *Hemoglobin* **1990**, *14*, 1–13.
  59. el-Kalla, S.; Mathews, A.R. A significant beta-thalassemia heterogeneity in the United Arab Emirates. *Hemoglobin* **1997**, *21*, 237–47.
  60. Baird, M.; Driscoll, C.; Schreiner, H.; Sciaratta, G. V; Sansone, G.; Niazi, G.; Ramirez, F.; Bank, A.; al., B. et A nucleotide change at a splice junction in the human beta-globin gene is associated with beta zero-thalassemia. *Proc. Natl. Acad. Sci. U. S. A.* **1981**, *78*, 4218–4221.
  61. Treisman, R.; Proudfoot, N.J.; Shander, M.; Maniatis, T. A single-base change at a splice site in a  $\beta$ -thalassemic gene causes abnormal RNA splicing. *Cell* **1982**, *29*, 903–911.
  62. Nozari, G.; Rahbar, S.; Golshaiyzan, A.; Rahmanzadeh, S. Molecular analyses of beta-thalassemia in Iran. *Hemoglobin* **1995**, *19*, 425–31.
  63. Frischknecht, H.; Dutly, F.; Walker, L.; Nakamura-Garrett, L.M.; Eng, B.; Wayne, J.S. Three new beta-thalassemia mutations with varying degrees of severity. *Hemoglobin* **2009**, *33*, 220–5.

64. Jiang, N.H.; Liang, S.; Su, C.; Nechtman, J.F.; Stoming, T.A. A novel beta-thalassemia mutation [IVS-II-5 (G-&gt;C)] in a Chinese family from Guangxi Province, P.R. China. *Hemoglobin* **1993**, *17*, 563–7.
65. Jiang, N.H.; Liang, S. The beta+ thalassemia mutation [IVS-II-5 (G-&gt;C)] creates an alternative splicing site in the second intervening sequence. *Hemoglobin* **1999**, *23*, 171–6.
66. Nadkarni, A.; Gorakshakar, A.; Surve, R.; Sawant, P.; Phanasgaonkar, S.; Nair, S.; Ghosh, K.; Colah, R.B. Hematological and molecular analysis of novel and rare beta-thalassemia mutations in the Indian population. *Hemoglobin* **2009**, *33*, 59–65.
67. Cheng, T.C.; Orkin, S.H.; Antonarakis, S.E.; Potter, M.J.; Sexton, J.P.; Markham, A.F.; Giardina, P.J.; Li, A.; Kazazian Jr., H.H. beta-Thalassemia in Chinese: use of in vivo RNA analysis and oligonucleotide hybridization in systematic characterization of molecular defects. *Proc Natl Acad Sci U S A* **1984**, *81*, 2821–2825.
68. Dobkin, C.; Pergolizzi, R.G.; Bahre, P.; Bank, A. Abnormal splice in a mutant human beta-globin gene not at the site of a mutation. *Proc Natl Acad Sci U S A* **1983**, *80*, 1184–1188.
69. Dobkin, C.; Bank, A. Reversibility of IVS 2 missplicing in a mutant human ??-globin gene. *J. Biol. Chem.* **1985**, *260*, 16332–16337.
70. Agouti, I.; Bennani, M.; Ahmed, A.; Barakat, A.; Mohamed, K.; Badens, C. Thalassemia intermedia due to a novel mutation in the second intervening sequence of the beta-globin gene. *Hemoglobin* **2007**, *31*, 433–8.
71. Nuntakarn, L.; Fucharoen, S.; Fucharoen, G.; Sanchaisuriya, K.; Jetsrisuparb, A.; Wiangnon, S. Molecular, hematological and clinical aspects of thalassemia major and thalassemia intermedia associated with Hb E-beta-thalassemia in Northeast Thailand. *Blood Cells. Mol. Dis.* **2009**, *42*, 32–5.
72. Varawalla, N.Y.; Old, J.M.; Weatherall, D.J. Rare beta-thalassaemia mutations in Asian Indians. *Br. J. Haematol.* **1991**, *79*, 640–4.
73. Beldjord, C.; Lapoumeroulie, C.; Pagnier, J.; Benabadi, M.; Krishnamoorthy, R.; Labie, D.; Bank, A. A novel beta thalassemia gene with a single base mutation in the conserved polypyrimidine sequence at the 3' end of IVS 2. *Nucleic Acids Res.* **1988**, *16*, 4927–35.
74. Cross, T.J.S.; Berry, P.A.; Akbar, N.; Wendon, J.; Thein, S.L.; Harrison, P.M. Sickle liver disease--an unusual presentation in a compound heterozygote for HbS and a novel beta-thalassemia mutation. *Am. J. Hematol.* **2007**, *82*, 852–4.
75. Rosatelli, M.C.; Pischedda, A.; Meloni, A.; Saba, L.; Pomo, A.; Travi, M.; Fattore, S.; Cao, A. Homozygous beta-thalassaemia resulting in the beta-thalassaemia carrier state phenotype. *Br. J. Haematol.* **1994**, *88*, 562–5.
76. Murru, S.; Loudianos, G.; Deiana, M.; Camaschella, C.; Sciaratta, G. V; Agosti, S.; Parodi, M.I.; Cerruti, P.; Cao, A.; Pirastu, M. Molecular characterization of beta-thalassemia intermedia in patients of Italian descent and identification of three novel beta-thalassemia mutations. *Blood* **1991**, *77*, 1342–7.
77. Gonzalez-Redondo, J.M.; Stoming, T.A.; Lanclos, K.D.; Gu, Y.C.; Kutlar, A.; Kutlar, F.; Nakatsuji, T.; Deng, B.; Han, I.S.; McKie, V.C. Clinical and genetic heterogeneity in black patients with homozygous beta-thalassemia from the southeastern United States. *Blood* **1988**, *72*, 1007–14.
78. Hattori, Y.; Yamamoto, K.; Yamashiro, Y.; Ohba, Y.; Miyamura, S.; Yamamoto, K.; Matsuno, Y.; Morishita, M.; Miyaji, T.; Era, T. Three beta-thalassemia mutations in the Japanese: IVS-II-1 (G----A), IVS-II-848 (C----G), and codon 90 (GAG----TAG). *Hemoglobin* **1992**, *16*, 93–7.
79. Jankovic, L.; Dimovski, A.J.; Kollia, P.; Karageorga, M.; Loukopoulos, D.; Huisman, T.H. A C----G mutation at nt position 6 3' to the terminating codon may be the cause of a silent beta-thalassemia. *Int. J. Hematol.* **1991**, *54*, 289–93.
80. Vinciguerra, M.; Passarello, C.; Cassarà, F.; Leto, F.; Cannata, M.; Calvaruso, G.; Di Maggio, R.; Renda, D.; Maggio, A.; Giambona, A. Co-heredity of silent CAP + 1570 T>C (HBB: C\*96T>C) defect and severe  $\beta$ -thal mutation: A cause of mild  $\beta$ -thalassemia intermedia. *Int. J. Lab. Hematol.* **2016**, *38*, 17–26.
81. Rund, D.; Dowling, C.; Najjar, K.; Rachmilewitz, E.A.; Kazazian, H.H.; Oppenheim, A. Two mutations in the beta-globin polyadenylation signal reveal extended transcripts and new RNA polyadenylation sites. *Proc. Natl. Acad. Sci. U. S. A.* **1992**, *89*, 4324–8.
82. Ma, S.K.; Lee, A.C.; Chan, A.Y.; Chan, L.C. A novel AATAAA-->CATAAA mutation at the polyadenylation site of the beta-globin gene. *Br. J. Haematol.* **2001**, *115*, 230–1.
83. Wayne, J.S.; Eng, B.; Patterson, M.; Reis, M.D.; Macdonald, D.; Chui, D.H. Novel beta-thalassemia mutation in a beta-thalassemia intermedia patient. *Hemoglobin* **2001**, *25*, 103–5.
84. Kimberland, M.L.; Boehm, C.D.; Kazazian, H.H. Two novel beta-thalassemia alleles: poly A signal (AATAAA-->AAAA) and -92 C-->T. *Hum. Mutat.* **1995**, *5*, 275–6.

85. Orkin, S.H.; Cheng, T.C.; Antonarakis, S.E.; Kazazian, H.H. Thalassemia due to a mutation in the cleavage-polyadenylation signal of the human beta-globin gene. *EMBO J.* **1985**, *4*, 453–6.
86. Jacquette, A.; Le Roux, G.; Lacombe, C.; Goossens, M.; Pissard, S. Compound heterozygosity for two new mutations in the beta-globin gene [codon 9 (+TA) and polyadenylation site (AATAAA-->AAAAAA)] leads to thalassemia intermedia in a Tunisian patient. *Hemoglobin* **2004**, *28*, 243–8.
87. Henderson, S.J.; Timbs, A.T.; McCarthy, J.; Gallienne, A.E.; Proven, M.; Rugless, M.J.; Lopez, H.; Eglinton, J.; Dziedzic, D.; Beardsall, M.; et al. Ten Years of Routine  $\alpha$ - and  $\beta$ -Globin Gene Sequencing in UK Hemoglobinopathy Referrals Reveals 60 Novel Mutations. *Hemoglobin* **2016**, *40*, 75–84.
88. Jankovic, L.; Efremov, G.D.; Petkov, G.; Kattamis, C.; George, E.; Yang, K.G.; Stoming, T.A.; Huisman, T.H. Two novel polyadenylation mutations leading to beta(+)-thalassemia. *Br. J. Haematol.* **1990**, *75*, 122–6.
89. Henderson, S.J.; Timbs, A.T.; McCarthy, J.; Gallienne, A.E.; Proven, M.; Rugless, M.J.; Lopez, H.; Eglinton, J.; Dziedzic, D.; Beardsall, M.; et al. Ten Years of Routine  $\alpha$  - and  $\beta$  -Globin Gene Sequencing in UK Hemoglobinopathy Referrals Reveals 60 Novel Mutations. *Hemoglobin* **2016**, *40*, 75–84.
90. Rund, D.; Filon, D.; Dowling, C.; Kazazian, H.H.; Rachmilewitz, E.A.; Oppenheim, A. Molecular studies of beta-thalassemia in Israel. Mutational analysis and expression studies. *Ann. N. Y. Acad. Sci.* **1990**, *612*, 98–105.
91. Herrera, M.A.; De La Fuente-Gonzalo, F.; González, F.A.; Nieto, J.M.; Dominguez, A.B.; Villegas, A.; Roperio, P. Identification of a novel mutation in the  $\beta$ -globin gene 3' untranslated region (HBB: c.\*+118A &gt; G) in Spain. *Hemoglobin* **2015**, *39*, 30–5.
92. Smith, D.L.; Mitui, M.; Park, J.Y.; Luu, H.S.; Timmons, C.F. Characterization of the HBB: c.\*233G &gt; C Variant: No Evidence of a  $\beta$ -Thalassemic Phenotype. *Hemoglobin* **2016**, *40*, 25–8.
93. Kountouris, P.; Lederer, C.W.; Fanis, P.; Feleki, X.; Old, J.; Kleanthous, M. IthaGenes: An interactive database for haemoglobin variations and epidemiology. *PLoS One* **2014**, *9*, e103020.

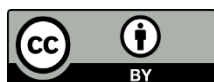

© 2019 by the authors. Submitted for possible open access publication under the terms and conditions of the Creative Commons Attribution (CC BY) license (<http://creativecommons.org/licenses/by/4.0/>).
